# Supplementary material for: Advanced Therapy Medicinal Products: Availability, Access and Expenditure in Italy
Source: PubMed Central journal article supplement — BioDrugs. 2024 Oct 15;38(6):831–44. doi: 10.1007/s40259-024-00683-0 (PMC11530470; doi:10.1007/s40259-024-00683-0), 2024-10-15
Supplement: 40259_2024_683_MOESM1_ESM.pdf [file 40259_2024_683_MOESM1_ESM.pdf]

## Advanced therapy medicinal products: availability, access and expenditure in Italy

### Public Health

Pia Rivetti di Val Cervo<sup>1</sup>, Eva Alessi<sup>1</sup>, Marilena Lastella<sup>1</sup>, Antonio La Greca<sup>1</sup> and Francesco Trotta<sup>1</sup>

<sup>1</sup>Italian Medicines Agency, HTA & Pharmaceutical Economics Department  
Via del Tritone 181, 00187, Rome, Italy

Corresponding author:

Pia Rivetti di Val Cervo

Email: p.rivettidivalcervo@aifa.gov.it

OrcID: 0000-0001-5999-1230

### Supplementary Analysis

In this supplementary section, six indicators are shown to describe the time elapsed for the main milestones for each ATMP authorised at EMA level (Figure S1), all times were expressed in days. In Figure S2, the clinical development, regulatory assessment and patient access times are represented for all EC authorised ATMPs in Italy.

**Figure S1:** Timeline leading to patient access in Italy

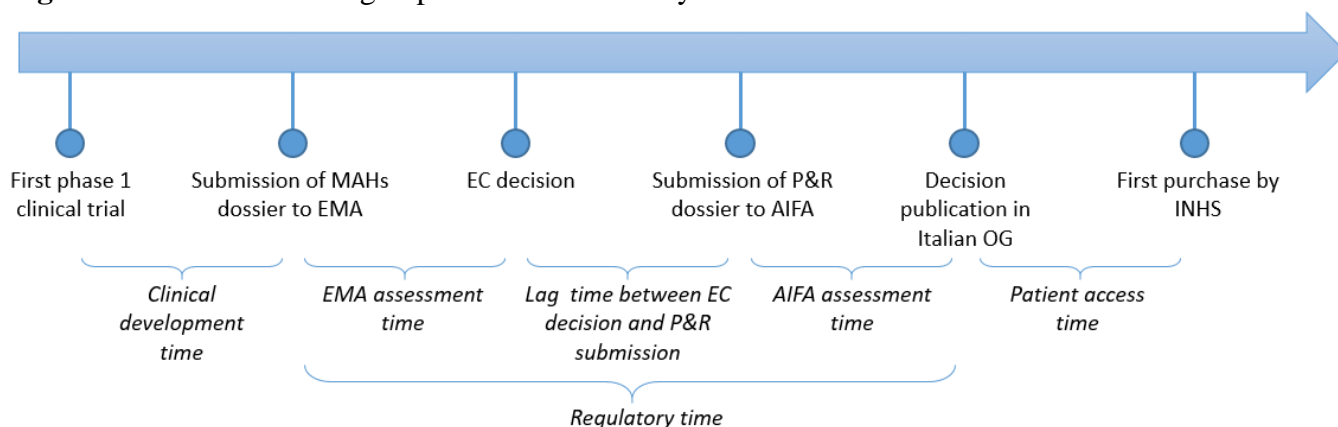

**Legend:**

INHS: Italian National Health System, AIFA: Italian Medicines Agency; EMA: European Medicines Agency; MAHs: Marketing Authorization Holders; OG: Official Gazette of the Italian Republic; P&R: Pricing and Reimbursement; EC: European Commission.

**Figure S2:** Time of clinical development, regulatory assessment and patient access for ATMPs in Italy (data shown in days, therapies ordered by year of EC authorization).

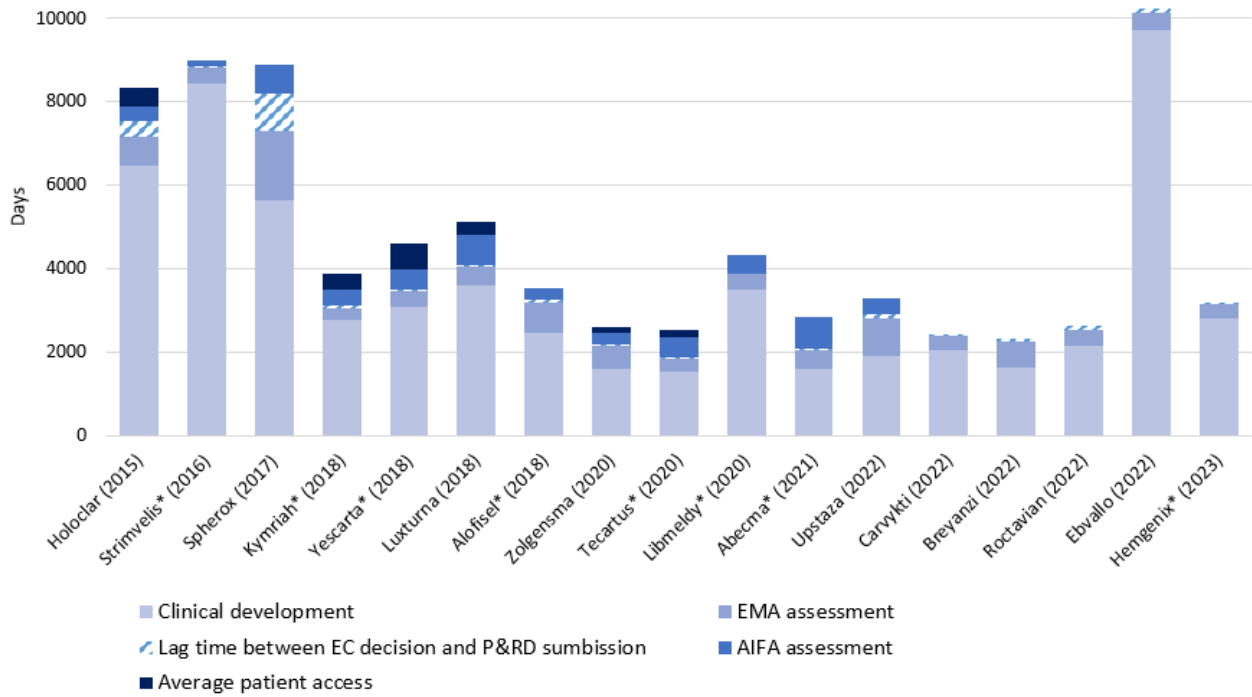

**Legend:**

AIFA: Italian Medicines Agency, EMA: European Medicines Agency

\*in 8 cases the dossier has been submitted to AIFA before the EC decision was published.
